# Supplementary material
Source: Springer Nature journal article supplement (https://www.springermedizin.de/resource/supplementary/12963_2009_99_MOESM5_ESM.pdf/9572660)

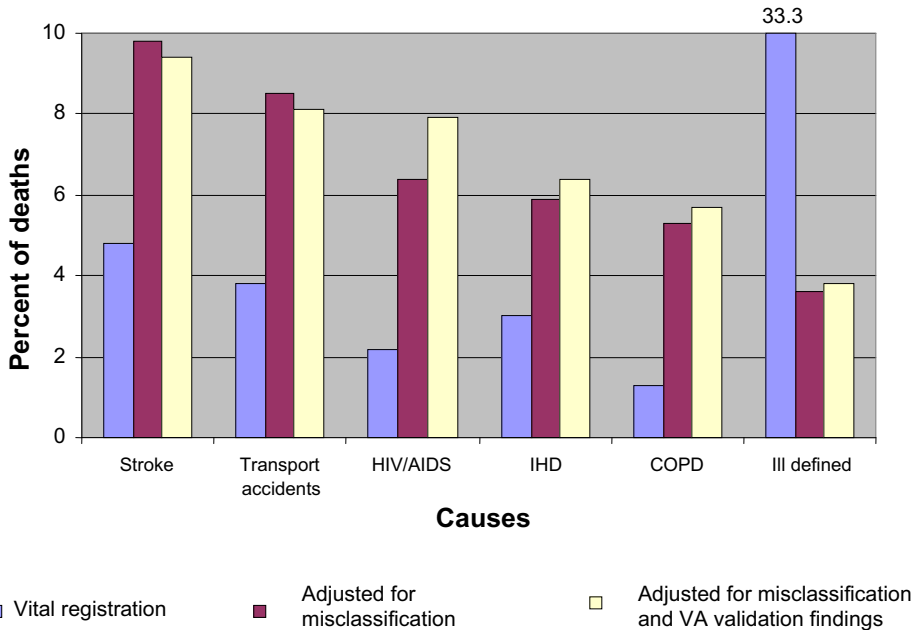

Supplement: MOESM5 [file 9572660]
